# Supplementary material for: Mechanical and Rheological Evaluation of Polyester-Based Composites Containing Biochar
Source: MDPI journal article supplement (doi:10.3390/polym16091231), 2024-04-28
Supplement: s1 [file s1]

## Supplementary materials

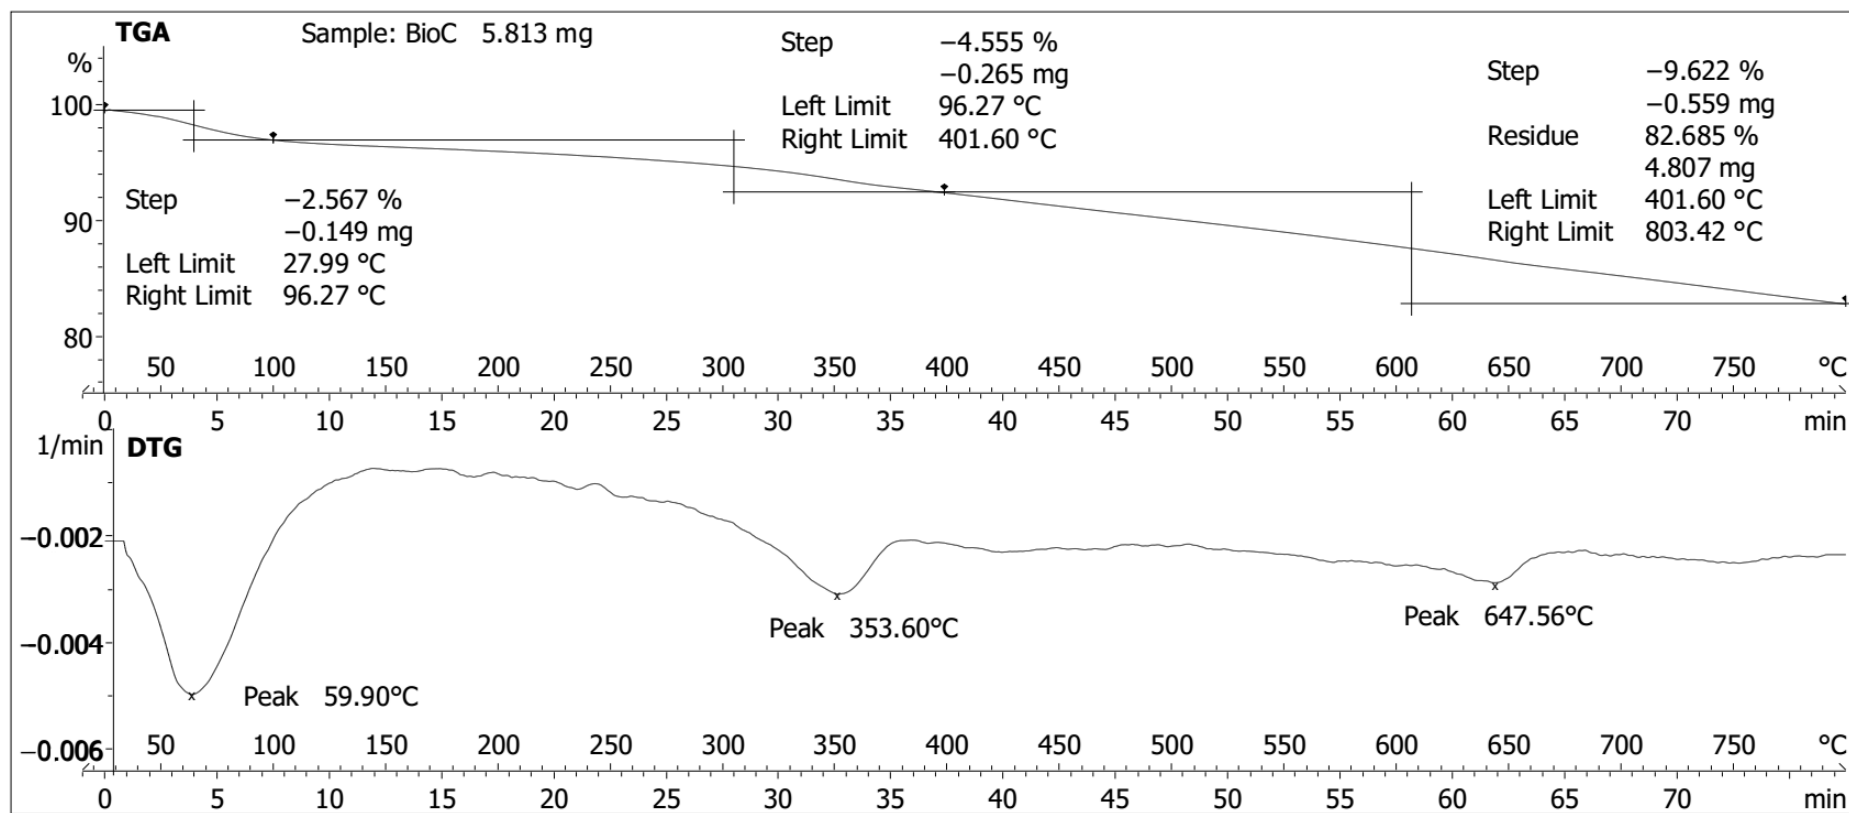

Figure S1. TGA and DTG curves of the biochar.

Table S1. Results of determination of tensile modulus and tensile strength

| Specimen                        | Tensile modulus |                    |  | Tensile strength |                    |
|---------------------------------|-----------------|--------------------|--|------------------|--------------------|
|                                 | E <sub>t</sub>  |                    |  | R <sub>m</sub>   |                    |
|                                 | [MPa]           |                    |  | [MPa]            |                    |
|                                 | Mean value      | Standard deviation |  | Mean value       | Standard deviation |
|                                 |                 |                    |  |                  |                    |
| PBAT/PLA                        | 281             | 16.8               |  | 11.1             | 0.10               |
| PBAT/PLA BC10                   | 377             | 14.3               |  | 11.9             | 0.07               |
| PBAT/PLA BC15                   | 422             | 7.43               |  | 12.3             | 0.08               |
| PBAT/PLA BC20                   | 457             | 19.7               |  | 13.1             | 0.03               |
| PBAT/PLA BC30                   | 573             | 21.2               |  | 13.9             | 0.10               |
|                                 |                 |                    |  |                  |                    |
| PLA/P(3HB- <i>co</i> -4HB)      | 1230            | 45.8               |  | 35.6             | 1.41               |
| PLA/P(3HB- <i>co</i> -4HB) BC10 | 1350            | 118                |  | 30.0             | 0.26               |
| PLA/P(3HB- <i>co</i> -4HB) BC15 | 1270            | 169                |  | 28.0             | 1.10               |
| PLA/P(3HB- <i>co</i> -4HB) BC20 | 2000            | 264                |  | 26.8             | 0.80               |
| PLA/P(3HB- <i>co</i> -4HB) BC30 | 2756            | 110                |  | 27.1             | 0.50               |

Table S2. Results of determination of elongation at yield and elongation at break

| Specimen                        | Elongation at yield |                    |  | Elongation at break |                    |
|---------------------------------|---------------------|--------------------|--|---------------------|--------------------|
|                                 | $\epsilon_y$        |                    |  | $\epsilon_b$        |                    |
|                                 | [%]                 |                    |  | [%]                 |                    |
|                                 | Mean value          | Standard deviation |  | Mean value          | Standard deviation |
| PBAT/PLA                        | 14.0                | 0.38               |  | 19.0                | 3.80               |
| PBAT/PLA BC10                   | 11.0                | 0.23               |  | 12.0                | 0.42               |
| PBAT/PLA BC15                   | 9.8                 | 1.10               |  | 13.0                | 0.86               |
| PBAT/PLA BC20                   | 9.5                 | 1.10               |  | 12.0                | 1.00               |
| PBAT/PLA BC30                   | 7.7                 | 0.51               |  | 10.0                | 0.15               |
| PLA/P(3HB- <i>co</i> -4HB)      | 2.3                 | 0.08               |  | 16.0                | 4.70               |
| PLA/P(3HB- <i>co</i> -4HB) BC10 | 2.2                 | 0.10               |  | 6.0                 | 2.60               |
| PLA/P(3HB- <i>co</i> -4HB) BC15 | 2.0                 | 0.04               |  | 5.8                 | 1.00               |
| PLA/P(3HB- <i>co</i> -4HB) BC20 | 1.8                 | 0.09               |  | 6.5                 | 2.50               |
| PLA/P(3HB- <i>co</i> -4HB) BC30 | 1.5                 | 0.09               |  | 5.6                 | 1.40               |

Table S3. Results of determination of Charpy impact strength of notched specimens

| Specimen               | Charpy impact strength |                    |
|------------------------|------------------------|--------------------|
|                        | $a_{cN}$               |                    |
|                        | $[kJ/m^2]$             |                    |
|                        | Mean value             | Standard deviation |
| PBAT/PLA               | 9.13                   | 0.53               |
| PBAT/PLA BC10          | 8.64                   | 0.67               |
| PBAT/PLA BC15          | 6.59                   | 0.30               |
| PBAT/PLA BC20          | 7.12                   | 2.09               |
| PBAT/PLA BC30          | 6.36                   | 0.78               |
| PLA/P(3HB-co-4HB)      | 4.47                   | 1.19               |
| PLA/P(3HB-co-4HB) BC10 | 2.84                   | 0.14               |
| PLA/P(3HB-co-4HB) BC15 | 2.48                   | 0.45               |
| PLA/P(3HB-co-4HB) BC20 | 2.25                   | 0.28               |
| PLA/P(3HB-co-4HB) BC30 | 1.61                   | 0.22               |
